# Supplementary material
Source: Springer Nature journal article supplement (https://www.springermedizin.de/resource/supplementary/12967_2009_376_MOESM8_ESM.pdf/9576346)

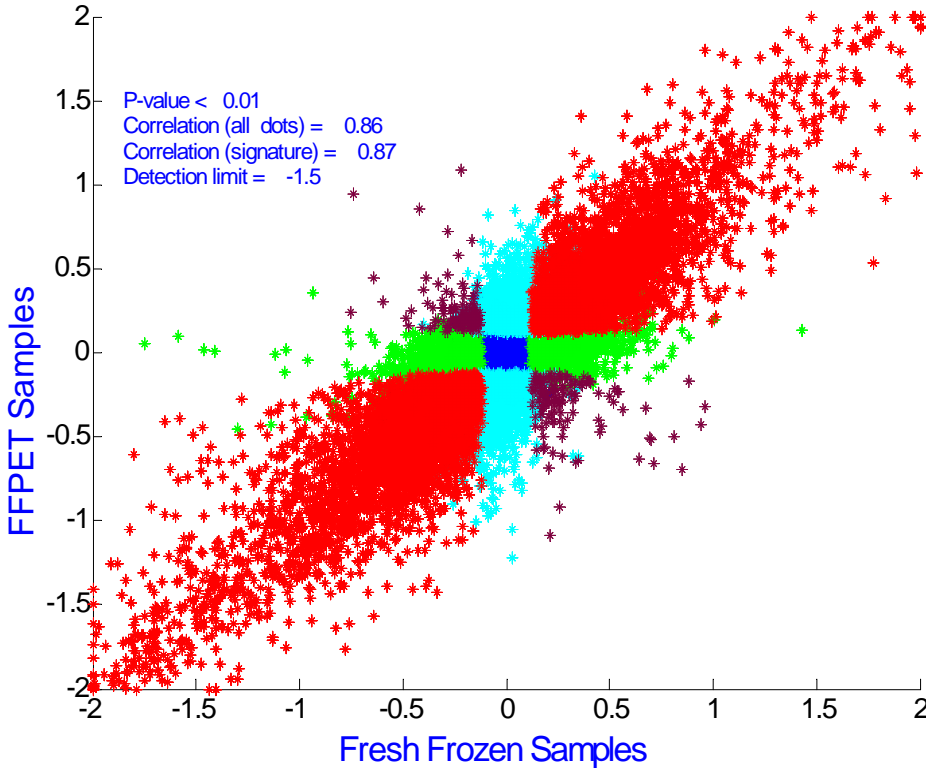

Supplement: MOESM8 [file 9576346]
